# Supplementary material for: The Ms6 Mycolyl-Arabinogalactan Esterase LysB is Essential for an Efficient Mycobacteriophage-Induced Lysis
Source: MDPI journal article supplement (doi:10.3390/v9110343), 2017-11-17
Supplement: s1 [file s1]

Figure S1

A

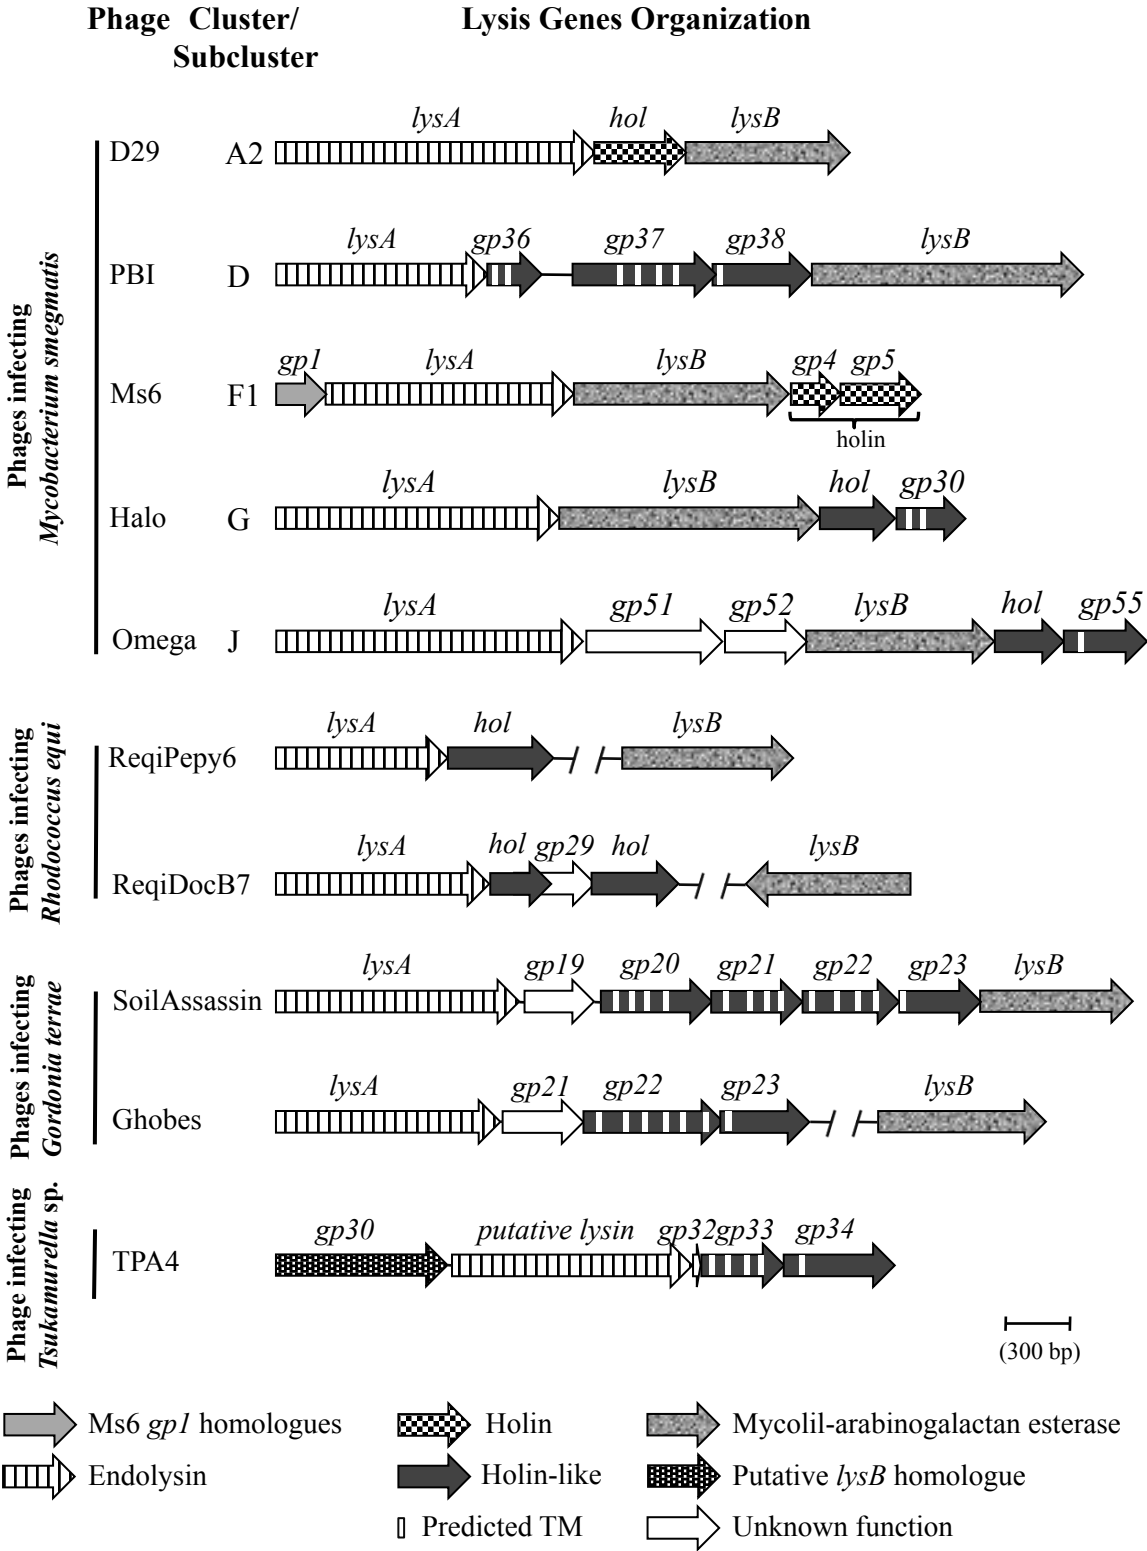

B

|              |     |                                  |     |
|--------------|-----|----------------------------------|-----|
| D29          | 70  | ...ADPYADFAMAGYSQGAIVVGQVLKH...  | 95  |
| PBI1         | 168 | ...KDPDVEFWFSGYSQKADGLEDALEI...  | 193 |
| Ms6          | 156 | ...RIETHGTALAGYSQGAVVLSELWMN...  | 181 |
| Halo         | 175 | ...VNPKIRVVIGGYSAGAIAAAMF-RA...  | 199 |
| Omega        | 85  | ...RTTPGKIVLSAYSQSAVAFAYVWRD...  | 110 |
| ReqiPepy6    | 76  | ...SNPGKQFILLAYSGGNRVIHEW-ME...  | 100 |
| ReqiDocB7    | 53  | ...-FTRQAIFVAGYSQGGTVVTKAIKH...  | 77  |
| SoilAssassin | 71  | ...ERSQFDVVVAGYSQGAHAVVHY-AL...  | 95  |
| Ghobes       | 77  | ...AHPDDRFRVVLGYSLGALVGTKF-LE... | 101 |
| TPA4         | 73  | ...AAARGRFVGLGYSQGGSLLTEWLN...   | 98  |

Figure S1 Comparison of *lysB* genes from phages infecting members of the Mycolata group. **(A)** Illustrated are representatives of mycobacteriophages and phages infecting *Rhodococcus equi*, *Gordoniae terrae* and *Tsukamurella* spp.. The genes marked with a white segment indicate genes not previously assigned as holins, but having predicted transmembrane segments. **(B)**. Alignment of Ms6 LysB and putative LysB protein homologues. The conserved pentapeptide (G/A-X-S-X-G) is highlighted on a grey background. Numbers refer to the amino acid positions.
