# Supplementary material for: The Ms6 Mycolyl-Arabinogalactan Esterase LysB is Essential for an Efficient Mycobacteriophage-Induced Lysis
Source: MDPI journal article supplement (doi:10.3390/v9110343), 2017-11-17
Supplement: s1 [file s1]

**Movie SI.** Sequence of cryo-electron tomography slices of *M. smegmatis* infected with Ms6 $\Delta$ *lysB* at 150 min post-adsorption. The middle section slices, show deformations of the cell envelope and many icosahedral phage capsids (Ms6 $\Delta$ *lysB*), indicating that the OM still holds part of the cell content even after disruption of the CM and PG. Scale bar 200 nm.
